# Supplementary material for: The Interplay between RNA Editing Regulator ADAR1 and Immune Environment in Colorectal Cancer
Source: Hindawi journal article supplement (doi:10.1155/2023/9315027), 2023-01-10

Methylation of ADAR in Solid Normal Tissue (n=38)  
Colon adenocarcinoma dataset

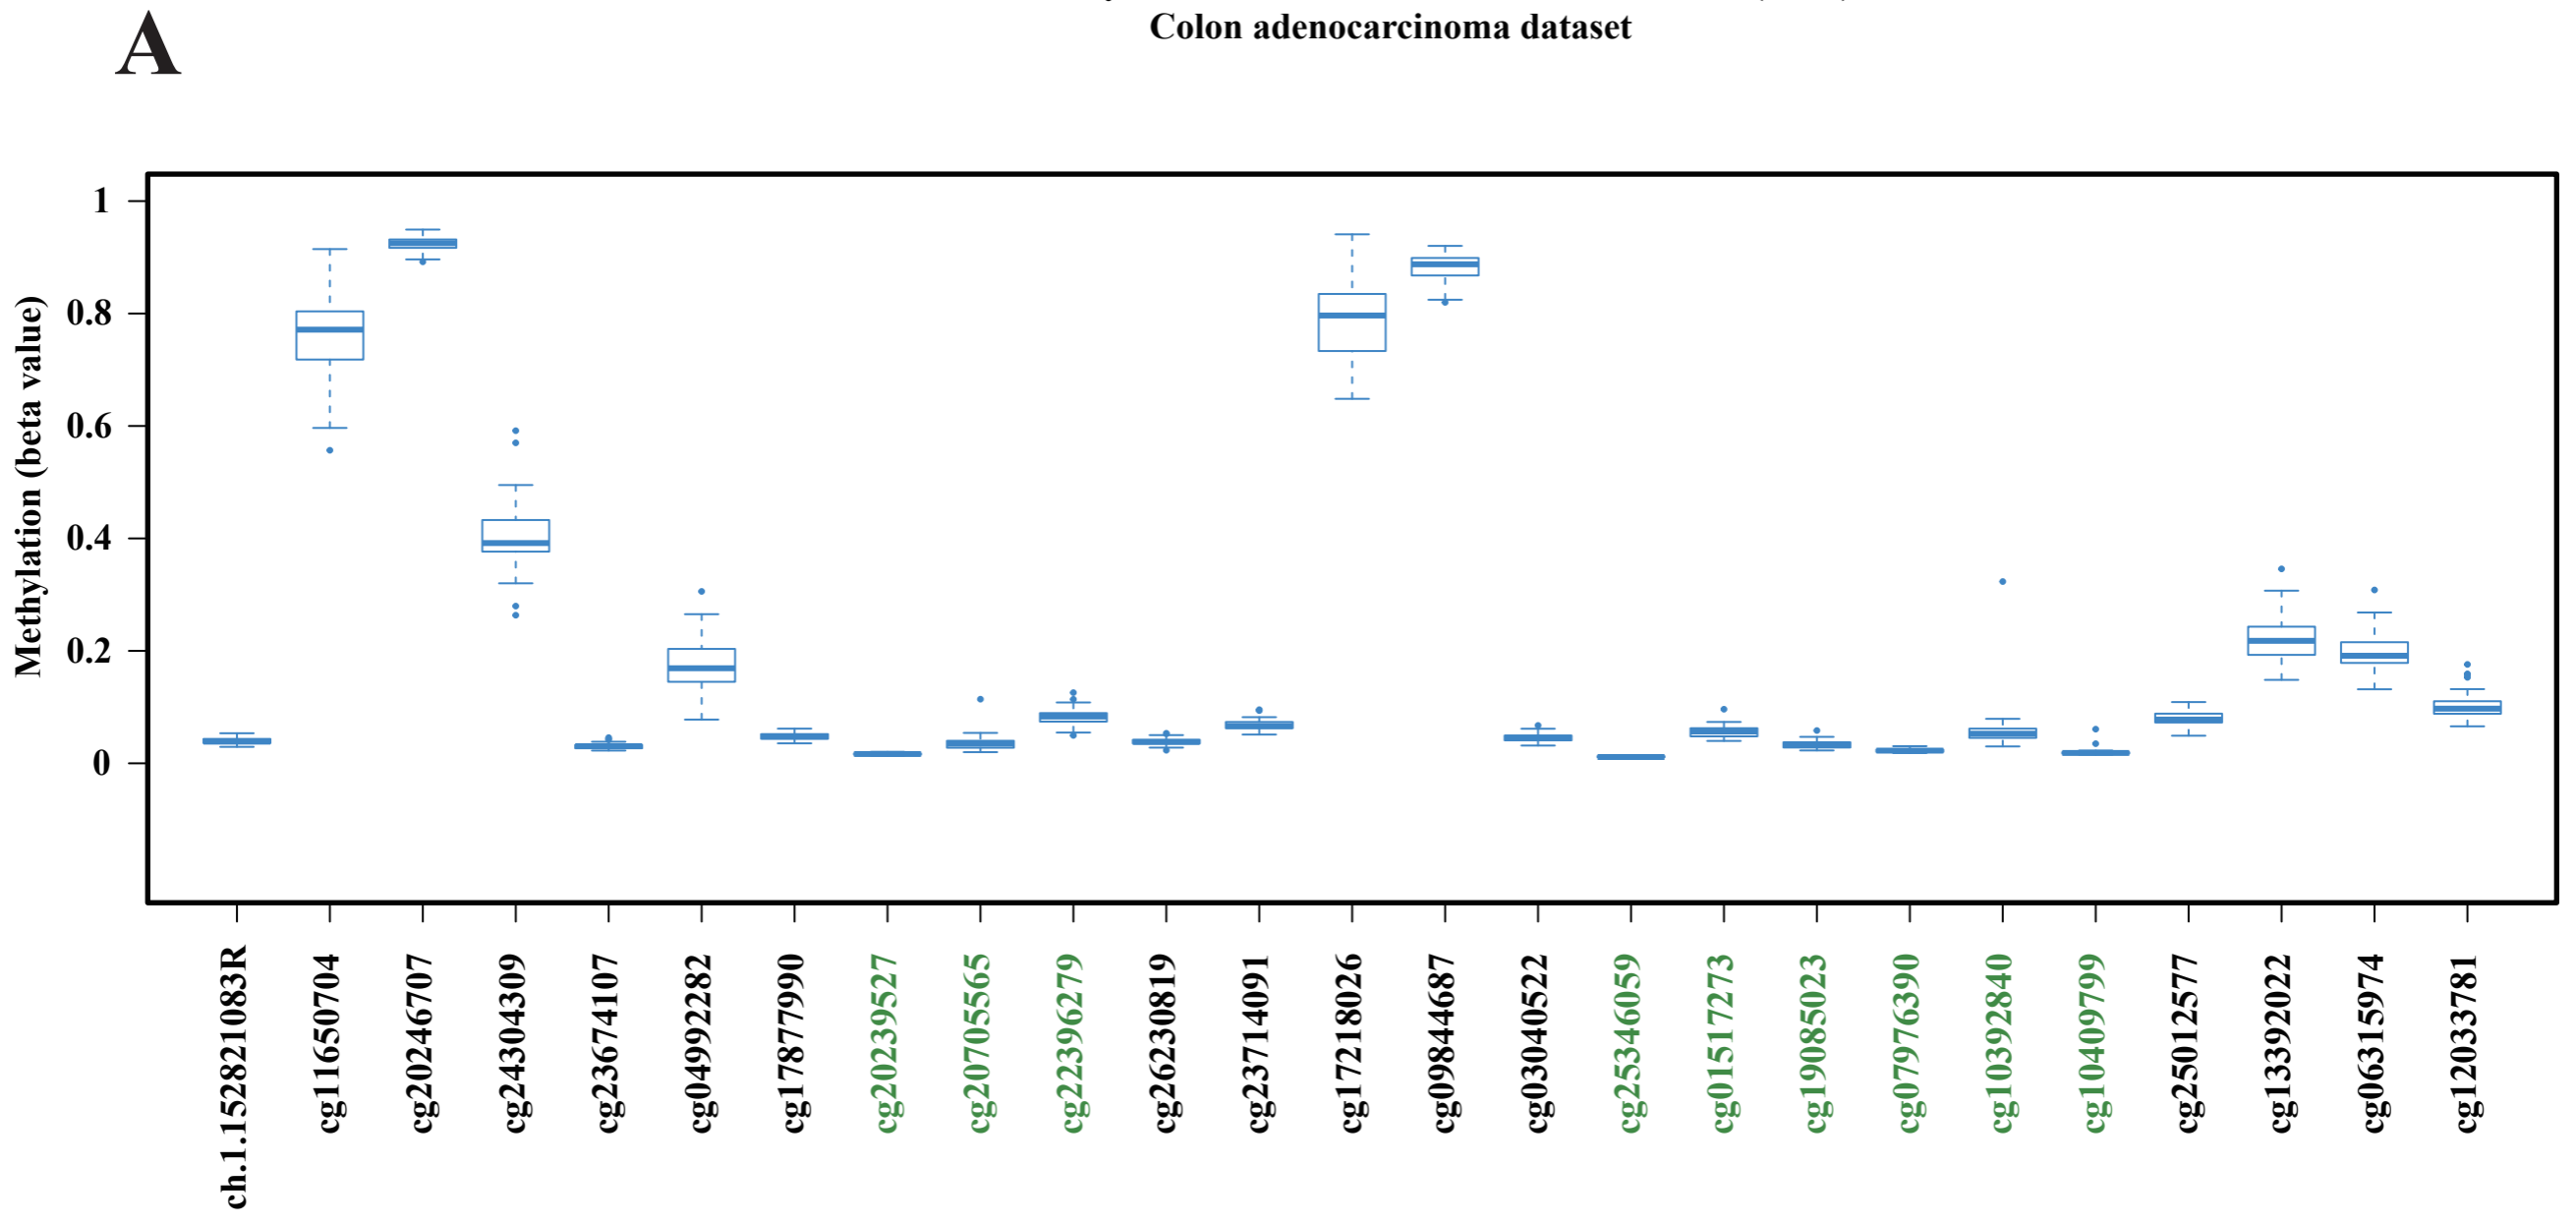

Methylation of ADAR in Tumor (n=302)  
Colon adenocarcinoma dataset

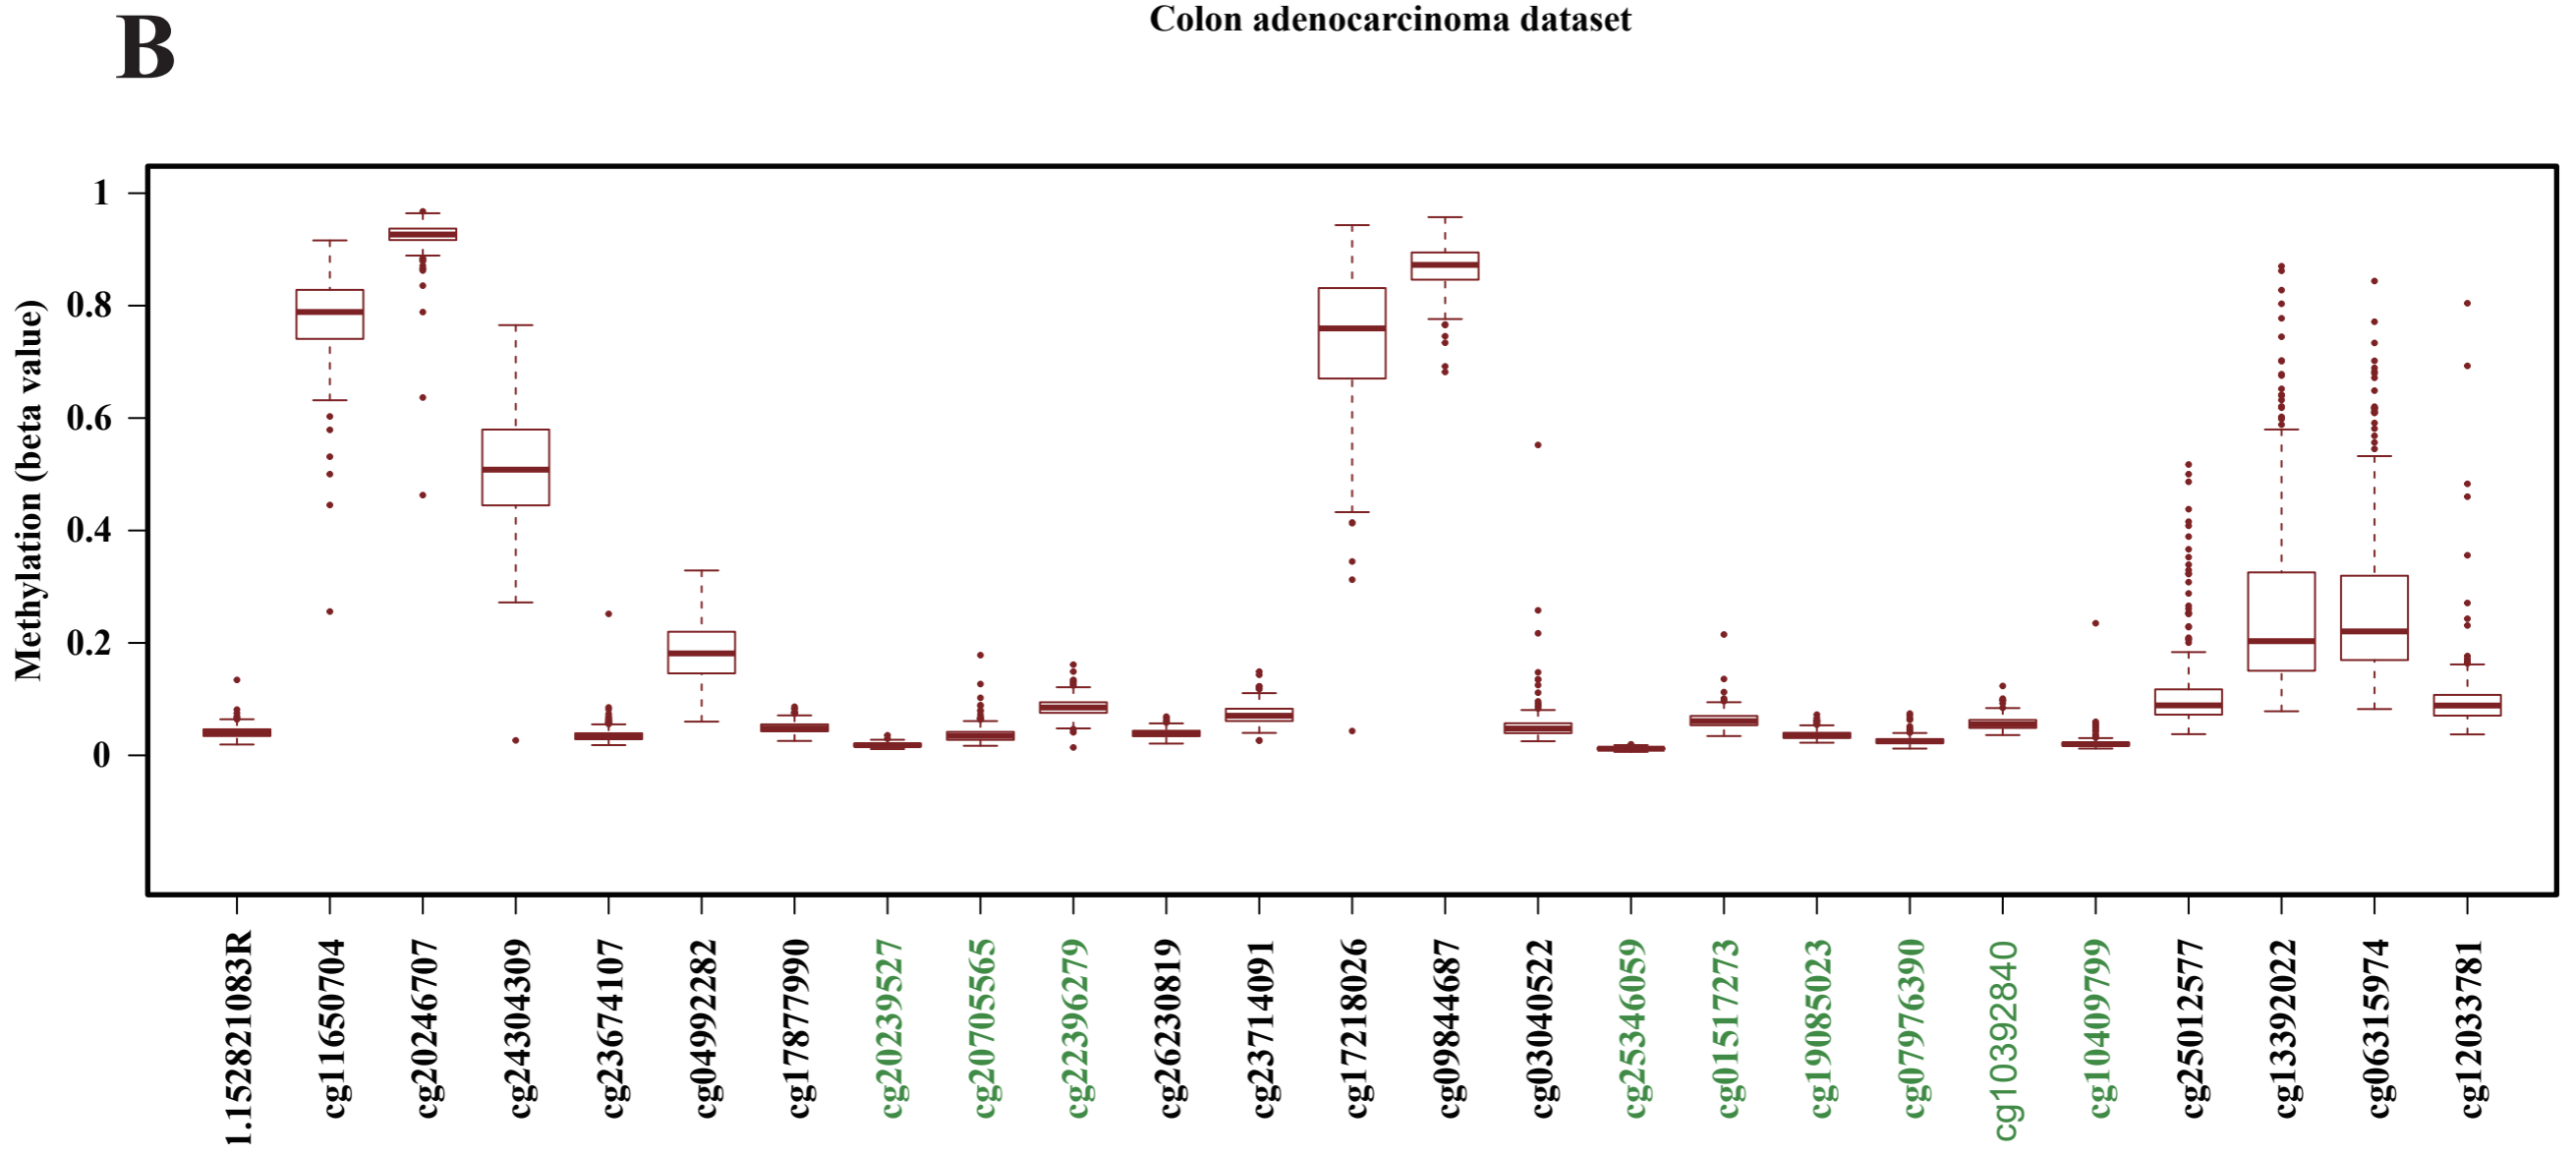

Mean Methylation of ADAR  
Colon adenocarcinoma versus Solid Normal Tissue

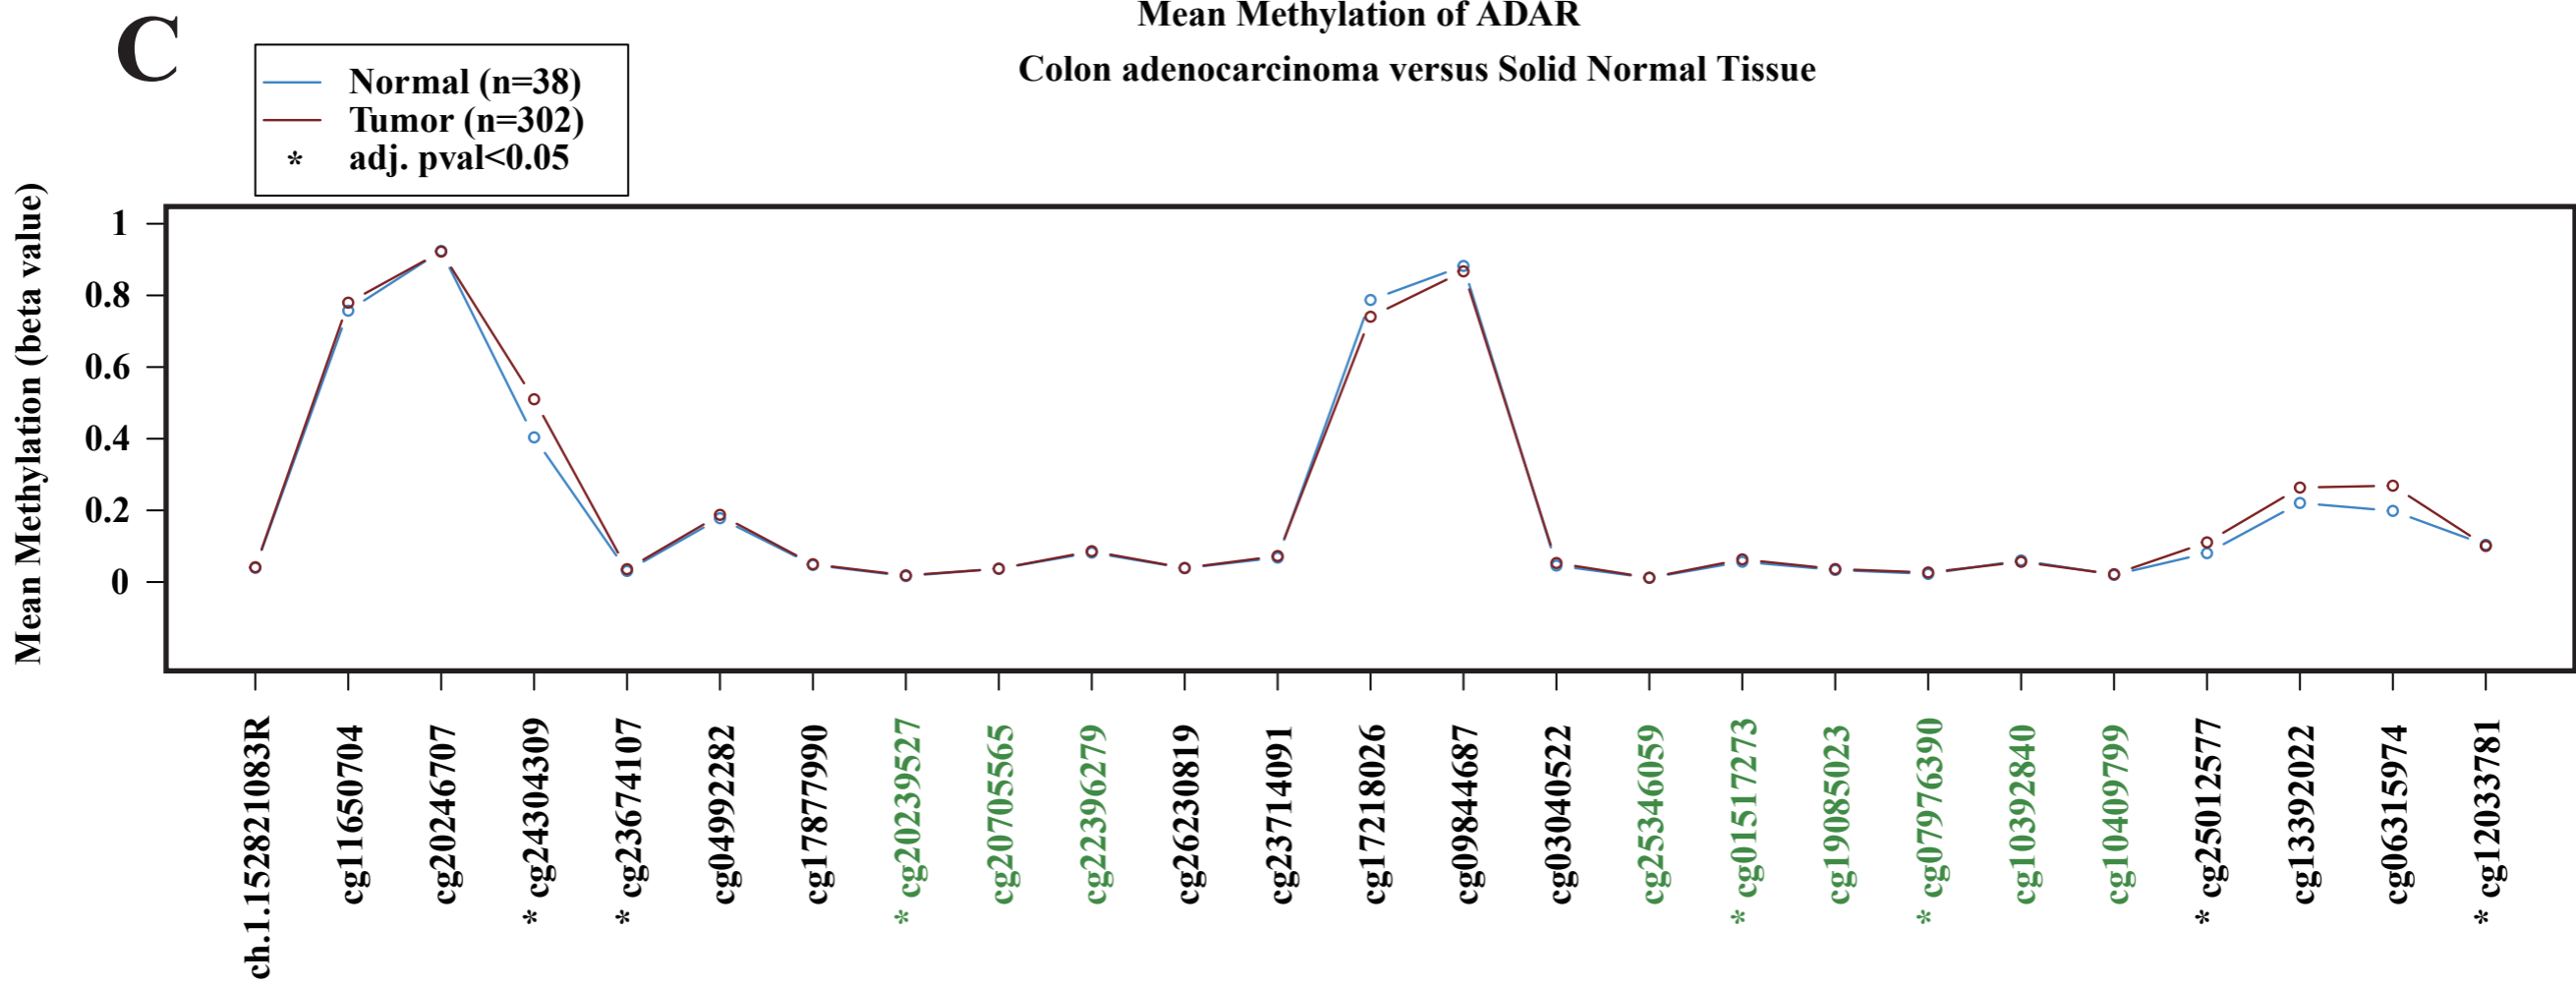

Supplement: f1 [file 9315027.f1.pdf]
